# Supplementary material for: Sub-cloud rain evaporation in the North Atlantic winter trade winds derived by pairing isotopic data with a bin-resolved microphysical model
Source: Copernicus journal article supplement (doi:10.5194/acp-23-12671-2023), 2023-10-11
Supplement: Supplementary file 1 [file acp-23-12671-2023-supplement.zip]

# **Sub-cloud rain evaporation in the North Atlantic winter trades derived by pairing isotopic data with a bin-resolved microphysical model**

Mampi Sarkar<sup>1</sup>, Adriana Bailey<sup>1</sup>, Peter Blossey<sup>2</sup>, Simon P. de Szoeke<sup>3</sup>, David Noone<sup>4</sup>, Estefania Quinones Melendez<sup>3</sup>, Mason D. Leandro<sup>5</sup>, and Patrick Y. Chuang<sup>5</sup>

<sup>1</sup>National Center for Atmospheric Research, Boulder, Colorado, USA

<sup>2</sup>University of Washington, Washington, USA

<sup>3</sup>Oregon State University, Oregon, USA

<sup>4</sup>University of Auckland, New Zealand

<sup>5</sup>University of California, Santa Cruz, California, USA

**Correspondence:** Mampi Sarkar (msarkar2@uh.edu)

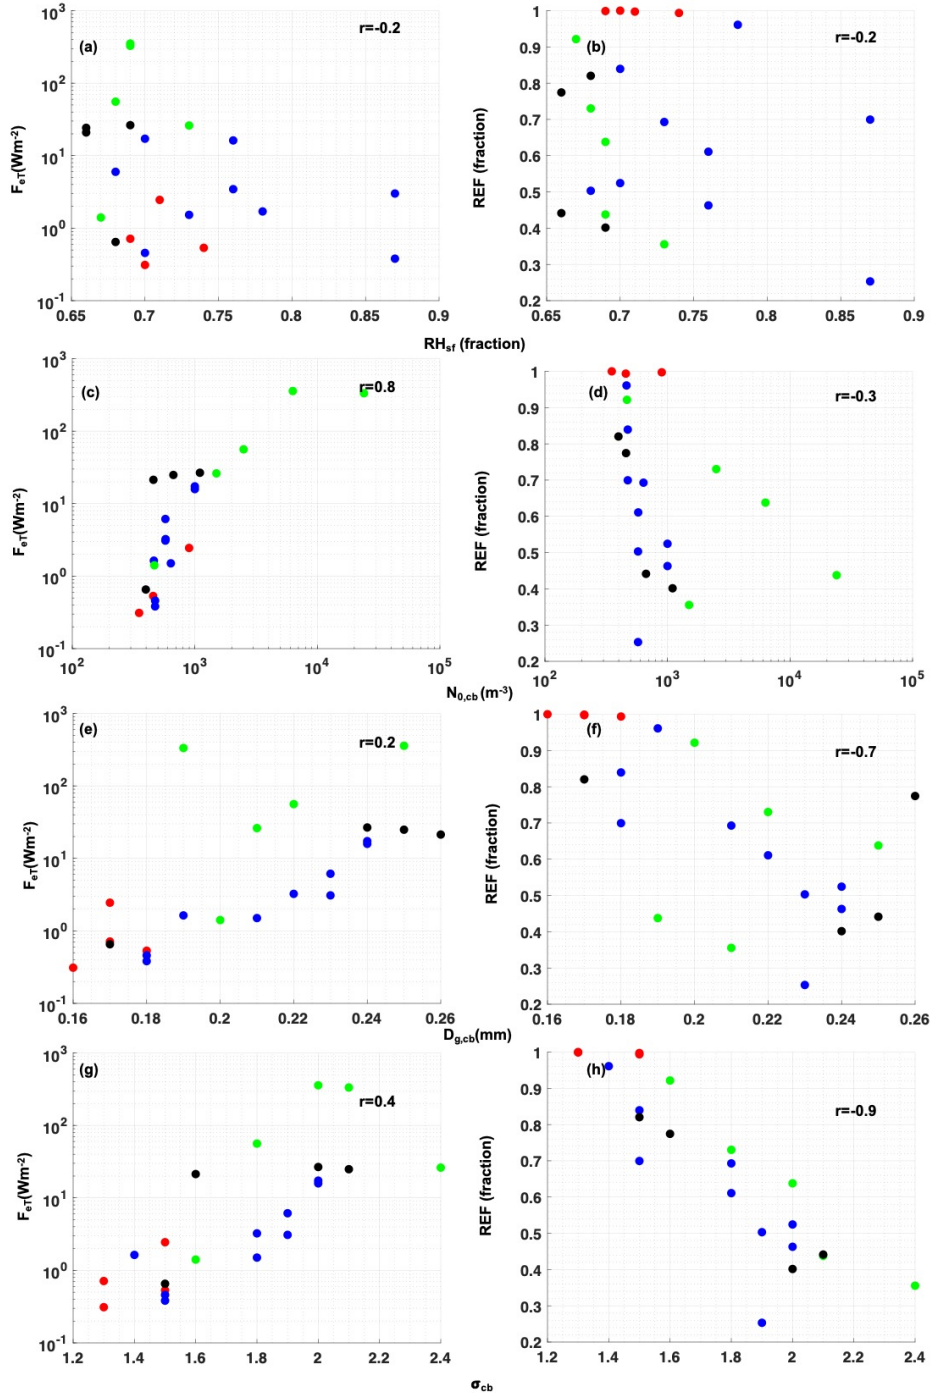

**Figure S1.** Scatter plots of  $F_{eT}$  and REF with a,b)  $RH_{sf}$ , c,d)  $N_{0,cb}$ , e,f)  $D_{g,cb}$ , and g,h)  $\sigma_{cb}$  for 4, 5, 9 and 10 February coded as red, blue, green and black filled circles, respectively.

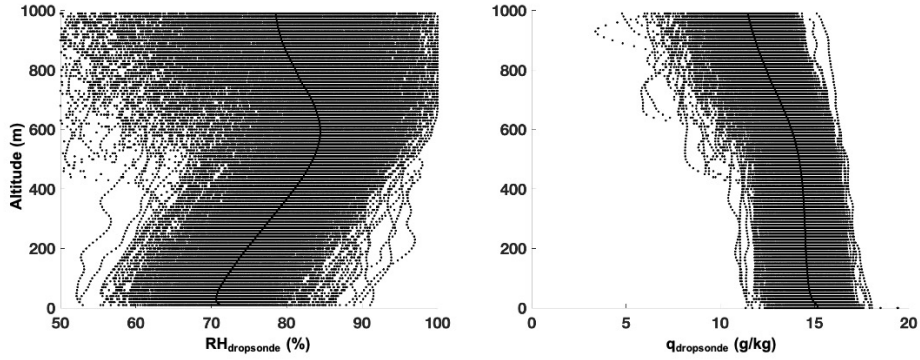

**Figure S2.** The relative humidity ( $RH_{dropsondes}$ ) in percentage (left) and specific humidity ( $q_{dropsondes}$ ) in g/kg (right) from the dropsondes plotted for all the P3 cases along the dropsonde altitude. The thick black lines are the mean values of RH and q calculated at each vertical level, and the dotted lines show the spread of RH and q.

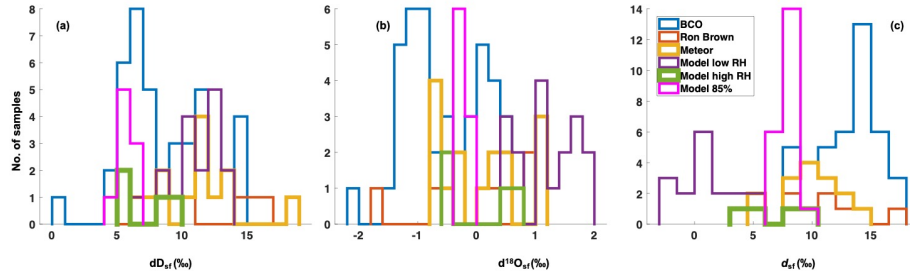

**Figure S3.** Histograms of surface a)  $\delta D_p$ , b)  $\delta^{18}O_p$  and c)  $d_p$  observed for the Brown (red), Meteor (yellow) and BCO (blue). The modeled values for the P3 cases with  $RH_{sf}$  less than 73% are shown in purple color (legend name: Model low RH). The modeled values with  $RH_{sf}$  higher than 73% are shown in the green line (legend name: Model high RH). The modeled values for the 22 P3 cases run at 85%  $RH_{sf}$  are shown in the magenta line (legend name: Model 85%).
