# Supplementary material for: Sub-cloud rain evaporation in the North Atlantic winter trade winds derived by pairing isotopic data with a bin-resolved microphysical model
Source: Copernicus journal article supplement (doi:10.5194/acp-23-12671-2023), 2023-10-11
Supplement: Supplementary file 2 [file acp-23-12671-2023-supplement.zip]

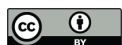

## *Supplement of*

# **Sub-cloud rain evaporation in the North Atlantic winter trade winds derived by pairing isotopic data with a bin-resolved microphysical model**

**Mampi Sarkar et al.**

*Correspondence to:* Mampi Sarkar (msarkar2@uh.edu)

- acp-23-12671-2023-supplement-title-page.pdf
- AdaptiveSubstep
  - .DS\_Store
  - alpha18.m
  - alphaD.m
  - diffusivity\_water\_vapor\_in\_air.m
  - es.m
  - evap.m
  - evap\_substep.m
  - evap\_substep\_standalone.m
  - terminal\_velocity\_rain.m
  - test\_case.m
  - thermal\_conductivity\_air.m
  - ventilation\_coefficient\_heat.m
  - ventilation\_coefficient\_mass.m
  - viscosity\_air.m
- Rain\_evaporation\_26July2023\_supplement.pdf

The copyright of individual parts of the supplement might differ from the article licence.
